# Supplementary material for: Catalytic efficiency of Cu-MOFs: HKUST-1 and CuBDC for the protodeboronation of aryl boronic acids
Source: Royal Society of Chemistry journal article supplement (doi:10.1039/d5ra04172d), 2025-01-01
Supplement: d5ra04172d1.pdf [file d5ra04172d1.pdf]

**Supporting Information for**

**Catalytic Efficiency of Cu-MOFs: HKUST-1 and CuBDC for the  
Protodeboronation of Aryl Boronic Acids**

Yudha P. Budiman,<sup>a,b,\*</sup> Muhamad Rashifari,<sup>a,b</sup> Muhamad Diki Permana,<sup>b,c</sup> Kansy  
Haikal,<sup>a</sup> Iis I. Widyowati,<sup>a</sup> Yessi Permana,<sup>d</sup> Ubed S. F. Arrozi,<sup>e</sup> Wirawan Ciptonugraha,<sup>f</sup>  
Tri Mayanti,<sup>a</sup> Allyn P. Sulaeman,<sup>a</sup> Juliandri,<sup>a</sup> Witri Wahyu Lestari<sup>f</sup>

<sup>a</sup>Department of Chemistry, Faculty of Mathematics and Natural Sciences, Universitas  
Padjadjaran, 45363 Sumedang, Indonesia

<sup>b</sup>Special Educational Program for Green Energy Conversion Science and Technology,  
Integrated Graduate School of Medicine, Engineering, and Agricultural Sciences, University of  
Yamanashi, Kofu 400-8511, Japan

<sup>c</sup>Center for Crystal Science and Technology, University of Yamanashi, Kofu 400-8511, Japan

<sup>d</sup>Inorganic and Physical Chemistry Research Division, Faculty of Mathematics and Natural  
Sciences, Institut Teknologi Bandung, Bandung 40132, Indonesia

<sup>e</sup>Department of Chemistry, Faculty of Mathematics and Natural Sciences, State University of  
Malang, 65145, Malang, Indonesia

<sup>f</sup>Department of Chemistry, Faculty of Mathematics and Natural Sciences, Universitas Sebelas  
Maret, Surakarta, 57126, Indonesia,

\*Corresponding author: [y.p.budiman@unpad.ac.id](mailto:y.p.budiman@unpad.ac.id)

## S1. General Information

Unless otherwise noted, all reagents were purchased from Sigma-Aldrich were checked for purity by GC-MS and used as received. Absolute ethanol (Sigma-Aldrich, 99.8%) was used as received. The removal of solvent was performed by an extraction method in a mixture of brine water (2 mL) and ethyl acetate (2 mL) three times.

High-angle X-ray diffraction patterns were obtained on a Rigaku Miniflex 600 D/teX Ultra diffractometer with Cu K $\alpha$  radiation. Infrared spectra were recorded on a Nicolet 380 FT-IR spectrometer as solids, using an ATR unit, and are reported in cm<sup>-1</sup>. GC-MS analyses were performed using an Agilent 7890A gas chromatograph (column: DB-5MS 5% phenylmethylsiloxane, 30 m, Ø 0.25 mm, film 0.25  $\mu$ m; \*injector: 200 °C; oven: 40 °C (2 min), 40 °C to 280 °C (20 °C min<sup>-1</sup>) (5 min) \*; carrier gas: He (1 mL min<sup>-1</sup>) equipped with an Agilent 5977B GC/MSD operating in EI mode). Copper atomic absorption spectrometry were conducted on a Perkin Elmer AAnalyst 400 AA with Series N30501XX Copper (Cu) Lumina hollow cathode lamp.

All NMR spectra were recorded at 298 K using an Agilent DD2 (<sup>1</sup>H-NMR, 500 MHz; <sup>13</sup>C{<sup>1</sup>H}-NMR, 125 MHz). <sup>1</sup>H-NMR chemical shifts are reported relative to TMS and were referenced via residual proton resonances of the corresponding deuterated solvent (CDCl<sub>3</sub>: 7.24 ppm), <sup>13</sup>C{<sup>1</sup>H}-NMR spectra are reported relative to TMS via the carbon signals of the deuterated solvent (CDCl<sub>3</sub>: 77.16 ppm

### S1.1 Synthesis of toluene (2a) from *p*-tolylboronic acid (1a)

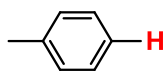

Compound **2a** was synthesized following the general procedure and using the following chemicals and conditions: *p*-tolylboronic acid (54.3 mg, 0.4 mmol), HKUST-1 (26.4 mg, 0.04 mmol), K<sub>2</sub>CO<sub>3</sub> (55.3 mg, 0.4 mmol), mesitylene (56 μL, 0.4 mmol), EtOH/H<sub>2</sub>O (1 mL : 1 mL), O<sub>2</sub> atmosphere, 70 °C, and 1.5 h.

**GCMS:** [t = 3.630 min ] m/z: 91 [*M*]<sup>+</sup>.

This compound is known.<sup>1</sup>

### S1.2 Synthesis of toluene (2a) from *m*-tolylboronic acid (1b)

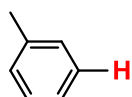

Compound **2a** was synthesized following the general procedure and using the following chemicals and conditions: *m*-tolylboronic acid (54.3 mg, 0.4 mmol), HKUST-1 (26.4 mg, 0.04 mmol), K<sub>2</sub>CO<sub>3</sub> (55.3 mg, 0.4 mmol), mesitylene (56 μL, 0.4 mmol), EtOH/H<sub>2</sub>O (1 mL : 1 mL), O<sub>2</sub> atmosphere, 70 °C, and 1.5 h.

**GCMS:** [t = 3.625 min ] m/z: 91 [*M*]<sup>+</sup>.

This compound is known.<sup>1</sup>

### S1.3 Synthesis of toluene (2a) from *o*-tolylboronic acid (1c)

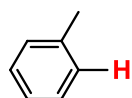

Compound **2a** was synthesized following the general procedure and using the following chemicals and conditions: *o*-tolylboronic acid (54.3 mg, 0.4 mmol), HKUST-1 (26.4 mg,

0.04 mmol), K<sub>2</sub>CO<sub>3</sub> (55.3 mg, 0.4 mmol), mesitylene (56  $\mu$ L, 0.4 mmol), EtOH/H<sub>2</sub>O (1 mL : 1 mL), O<sub>2</sub> atmosphere, 70  $^{\circ}$ C, and 1.5 h.

**GCMS:** [t = 3.633 min ] m/z: 91 [M]<sup>+</sup>.

This compound is known.<sup>1</sup>

#### S1.4 Synthesis of anisole (2d) from *p*-methoxyphenylboronic acid (1d)

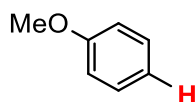

Compound **2d** was synthesized following the general procedure and using the following chemicals and conditions: *p*-methoxyphenylboronic acid (60.8 mg, 0.4 mmol), HKUST-1 (26.4 mg, 0.04 mmol), K<sub>2</sub>CO<sub>3</sub> (55.3 mg, 0.4 mmol), mesitylene (56  $\mu$ L, 0.4 mmol), EtOH/H<sub>2</sub>O (1 mL : 1 mL), O<sub>2</sub> atmosphere, 70  $^{\circ}$ C, and 1.5 h.

**GCMS:** [t = 5.353 min ] m/z: 109 [M]<sup>+</sup>.

This compound is known.<sup>1</sup>

#### S1.5 Synthesis of anisole (2d) from *o*-methoxyphenylboronic acid (1e)

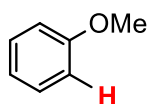

Compound **2d** was synthesized following the general procedure and using the following chemicals and conditions: *o*-methoxyphenylboronic acid (60.8 mg, 0.4 mmol), HKUST-1 (26.4 mg, 0.04 mmol), K<sub>2</sub>CO<sub>3</sub> (55.3 mg, 0.4 mmol), mesitylene (56  $\mu$ L, 0.4 mmol), EtOH/H<sub>2</sub>O (1 mL : 1 mL), O<sub>2</sub> atmosphere, 70  $^{\circ}$ C, and 1.5 h.

**GCMS:** [t = 5.346 min ] m/z: 109 [M]<sup>+</sup>.

This compound is known.<sup>1</sup>

### S1.6 Synthesis of fluorobenzene (2f)

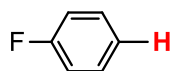

Compound **2f** was synthesized following the general procedure and using the following chemicals and conditions: *p*-fluorophenylboronic acid (56.0 mg, 0.4 mmol), HKUST-1 (26.4 mg, 0.04 mmol), K<sub>2</sub>CO<sub>3</sub> (55.3 mg, 0.4 mmol), mesitylene (56 μL, 0.4 mmol), EtOH/H<sub>2</sub>O (1 mL : 1 mL), O<sub>2</sub> atmosphere, 40 °C, and 1.5 h.

**GCMS:** [t = 2.626 min ] m/z: 96 [M]<sup>+</sup>.

This compound is known.<sup>2</sup>

### S1.7 Synthesis of bromobenzene (2g)

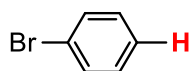

Compound **2g** was synthesized following the general procedure and using the following chemicals and conditions: *p*-bromophenylboronic acid (80.3 mg, 0.4 mmol), HKUST-1 (26.4 mg, 0.04 mmol), K<sub>2</sub>CO<sub>3</sub> (55.3 mg, 0.4 mmol), mesitylene (56 μL, 0.4 mmol), EtOH/H<sub>2</sub>O (1 mL : 1 mL), O<sub>2</sub> atmosphere, 70 °C, and 1.5 h.

**GCMS:** [t = 5.518 min ] m/z: 156 [M]<sup>+</sup>.

This compound is known.<sup>2</sup>

### S1.8 Synthesis of biphenyl (2h)

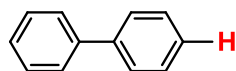

Compound **2h** was synthesized following the general procedure and using the following chemicals and conditions: biphenylboronic acid (79.2 mg, 0.4 mmol), HKUST-1 (26.4

mg, 0.04 mmol), K<sub>2</sub>CO<sub>3</sub> (55.3 mg, 0.4 mmol), mesitylene (56 μL, 0.4 mmol), EtOH/H<sub>2</sub>O (1 mL : 1 mL), O<sub>2</sub> atmosphere, 70 °C, and 1.5 h.

**GCMS:** [t = 9.287 min ] m/z: 155 [M]<sup>+</sup>.

**<sup>1</sup>H NMR** (500 MHz, CDCl<sub>3</sub>) δ = 7.64–7.63 (*m*, 4H; Ar-H), 7.48 (*t*, 4H, <sup>3</sup>J<sub>H,H</sub> = 8 Hz; Ar-H), 7.39 (*t*, 2H, <sup>3</sup>J<sub>H,H</sub> = 7 Hz; Ar-H); **<sup>13</sup>C{<sup>1</sup>H} NMR** (125 MHz, CDCl<sub>3</sub>) δ = 141.4, 128.9, 127.4, 127.3

This compound is known.<sup>2</sup>

### S1.9 Synthesis of *tert*-butylbenzene (2i)

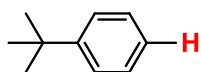

Compound **2i** was synthesized following the general procedure and using the following chemicals and conditions: *tert*-butylphenylboronic acid (71.2 mg, 0.4 mmol), HKUST-1 (26.4 mg, 0.04 mmol), K<sub>2</sub>CO<sub>3</sub> (55.3 mg, 0.4 mmol), mesitylene (56 μL, 0.4 mmol), EtOH/H<sub>2</sub>O (1 mL : 1 mL), O<sub>2</sub> atmosphere, 70 °C, and 1.5 h.

**GCMS:** [t = 6.091 min ] m/z: 134 [M]<sup>+</sup>.

This compound is known.<sup>2</sup>

### S1.10 Synthesis of benzo[*b*]thiophene (2j)

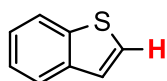

Compound **2j** was synthesized following the general procedure and using the following chemicals and conditions: benzo[*b*]thien-2-ylboronic acid (71.2 mg, 0.4 mmol), HKUST-1 (26.4 mg, 0.04 mmol), K<sub>2</sub>CO<sub>3</sub> (55.3 mg, 0.4 mmol), mesitylene (56 μL, 0.4 mmol), EtOH/H<sub>2</sub>O (1 mL : 1 mL), O<sub>2</sub> atmosphere, 70 °C, and 1.5 h. Due to strong interactions

between sulfur-containing heterocycles such as benzo[*b*]thiophene (**2j**) with silica gel during column chromatography, elution becomes challenging, resulting in a low isolated yield that is insufficient for NMR measurement.

**GCMS:** [t = 7.921 min ] m/z: 134 [*M*]<sup>+</sup>.

This compound is known.<sup>3</sup>

### S1.11 Synthesis of styrene (**2k**)

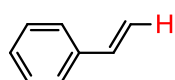

Compound **2k** was synthesized following the general procedure and using the following chemicals and conditions: trans-2-Phenylvinylboronic acid (29.6 mg, 0.2 mmol), HKUST-1 (13.2 mg, 0.02 mmol), K<sub>2</sub>CO<sub>3</sub> (27.6 mg, 0.2 mmol), mesitylene (28 μL, 0.2 mmol), EtOH/H<sub>2</sub>O (1 mL : 1 mL), O<sub>2</sub> atmosphere, 70 °C, and 1.5 h.

**GCMS:** [t = 4.946 min ] m/z: 104 [*M*]<sup>+</sup>.

This compound is known.<sup>4</sup>

### S1.12 Synthesis of ethylbenzene (**2l**)

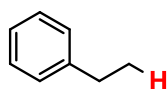

Compound **2l** was synthesized following the general procedure and using the following chemicals and conditions: trans-2-Phenylvinylboronic acid (30 mg, 0.2 mmol), HKUST-1 (13.2 mg, 0.02 mmol), K<sub>2</sub>CO<sub>3</sub> (27.6 mg, 0.2 mmol), mesitylene (28 μL, 0.2 mmol), EtOH/H<sub>2</sub>O (1 mL : 1 mL), O<sub>2</sub> atmosphere, 70 °C, and 1.5 h.

This compound is known.<sup>5</sup>

### S1.13 Synthesis of naphthalene (2m)

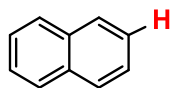

Compound **2m** was synthesized following the general procedure and using the following chemicals and conditions: 4,4,5,5-tetramethyl-2-(naphthalen-2-yl)-1,3,2-dioxaborolane (50.82 mg, 0.2 mmol), HKUST-1 (13.2 mg, 0.02 mmol), K<sub>2</sub>CO<sub>3</sub> (27.6 mg, 0.2 mmol), mesitylene (28  $\mu$ L, 0.2 mmol), EtOH/H<sub>2</sub>O (1 mL : 1 mL), O<sub>2</sub> atmosphere, 70 °C, and 1.5 h.

**GCMS:** [t = 7.759 min ] m/z: 128 [M]<sup>+</sup>. **<sup>1</sup>H NMR** (500 MHz, CDCl<sub>3</sub>)  $\delta$  = 3.10 (*q*, 4H, <sup>3</sup>J<sub>H,H</sub> = 3 Hz), 7.52 (*d*, 4H, <sup>3</sup>J<sub>H,H</sub> = 3 Hz); **<sup>13</sup>C NMR** (125 MHz, CDCl<sub>3</sub>)  $\delta$  = 133, 5, 128.0, 125.9; **GCMS:** [t = 7.935 min ] m/z: 134 [M]<sup>+</sup>.

This compound is known.<sup>2</sup>

### S1.14 Synthesis of toluene (2a) from 4,4,5,5-tetramethyl-2-(*m*-tolyl)-1,3,2-dioxaborolane (1n)

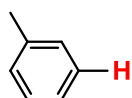

Compound **2n** was synthesized following the general procedure and using the following chemicals and conditions: 4,4,5,5-tetramethyl-2-(*m*-tolyl)-1,3,2-dioxaborolane (43.6 mg, 0.2 mmol), HKUST-1 (13.2 mg, 0.02 mmol), K<sub>2</sub>CO<sub>3</sub> (27.6 mg, 0.2 mmol), mesitylene (28  $\mu$ L, 0.2 mmol), EtOH/H<sub>2</sub>O (1 mL : 1 mL), O<sub>2</sub> atmosphere, 70 °C, and 1.5 h.

**GCMS:** [t = 3.633 min ] m/z: 91 [M]<sup>+</sup>.

This compound is known.<sup>1</sup>



## S2. GC-MS and $^1\text{H}$ , $^{13}\text{C}\{^1\text{H}\}$ NMR Spectra

S2.1 GC-MS spectrum of the reaction described in Table 3, entry 1, with mesitylene as the internal standard.

File :D:\Lab Sentral\Data\2022\Yudha Reserch Grup\2024\AR 27.D  
Operator :  
Acquired : 15 Nov 2024 17:45 using AcqMethod Umi.M  
Instrument : GCMS  
Sample Name:  
Misc Info :  
Vial Number: 0

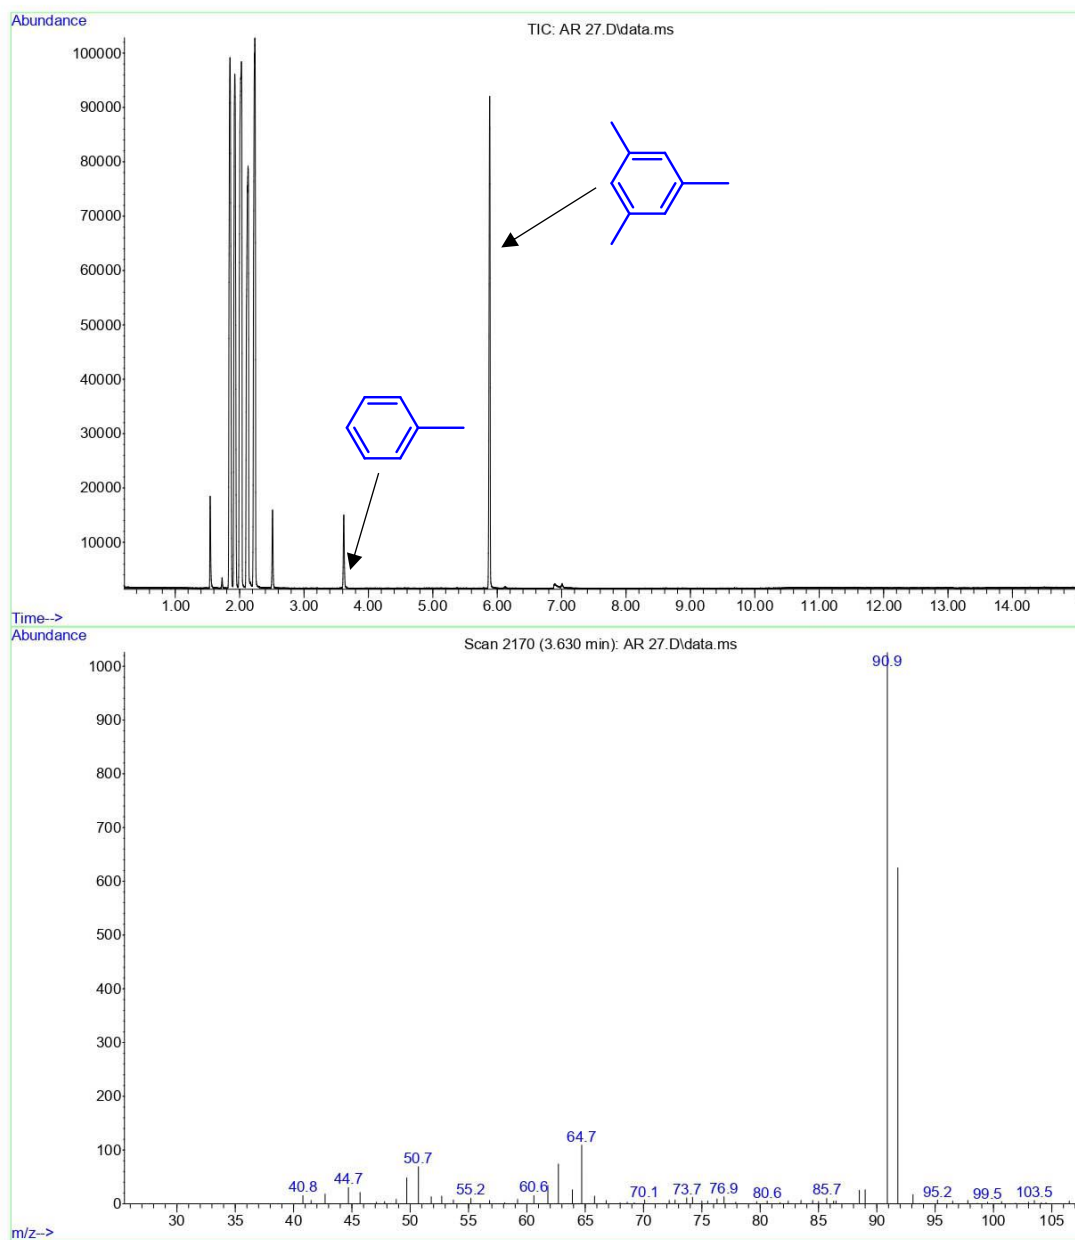

S2.2 GC–MS spectrum of the reaction described in Table 3, entry 2, with mesitylene as the internal standard.

File :D:\Lab Sentral\Data\2022\Yudha Reserch Grup\2024\AR 29.D  
Operator :  
Acquired : 28 Nov 2024 07:46 using AcqMethod Umi.M  
Instrument : GCMS  
Sample Name :  
Misc Info :  
Vial Number: 0

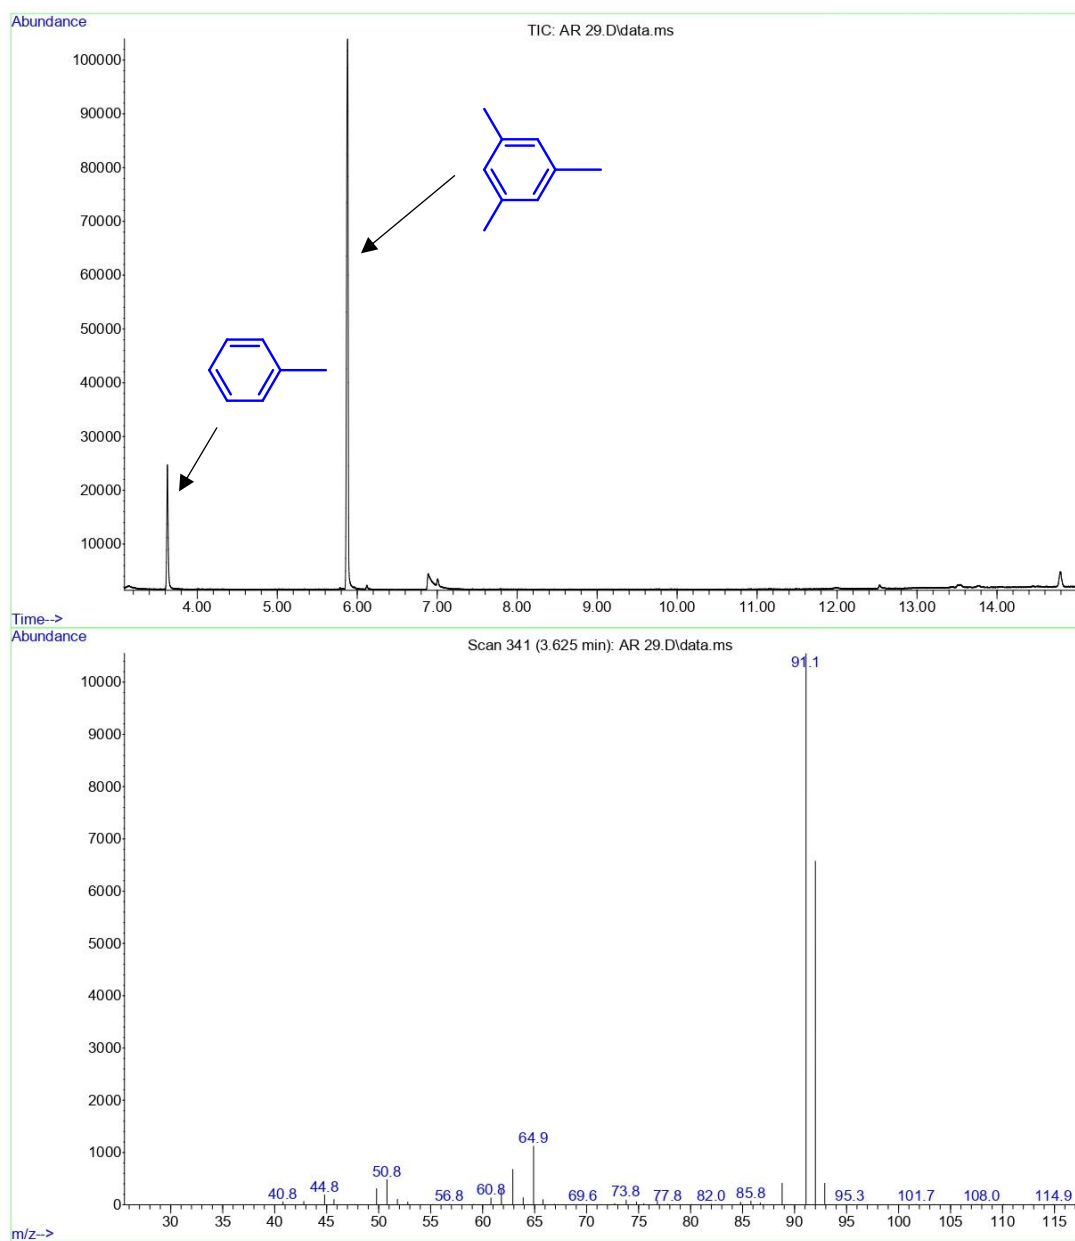

S2.3 GC–MS spectrum of the reaction described in Table 3, entry 3, with mesitylene as the internal standard.

File :D:\Lab Sentral\Data\2022\Yudha Reserch Grup\2024\AR 30.D  
Operator :  
Acquired : 28 Nov 2024 08:25 using AcqMethod Umi.M  
Instrument : GCMS  
Sample Name:  
Misc Info :  
Vial Number: 0

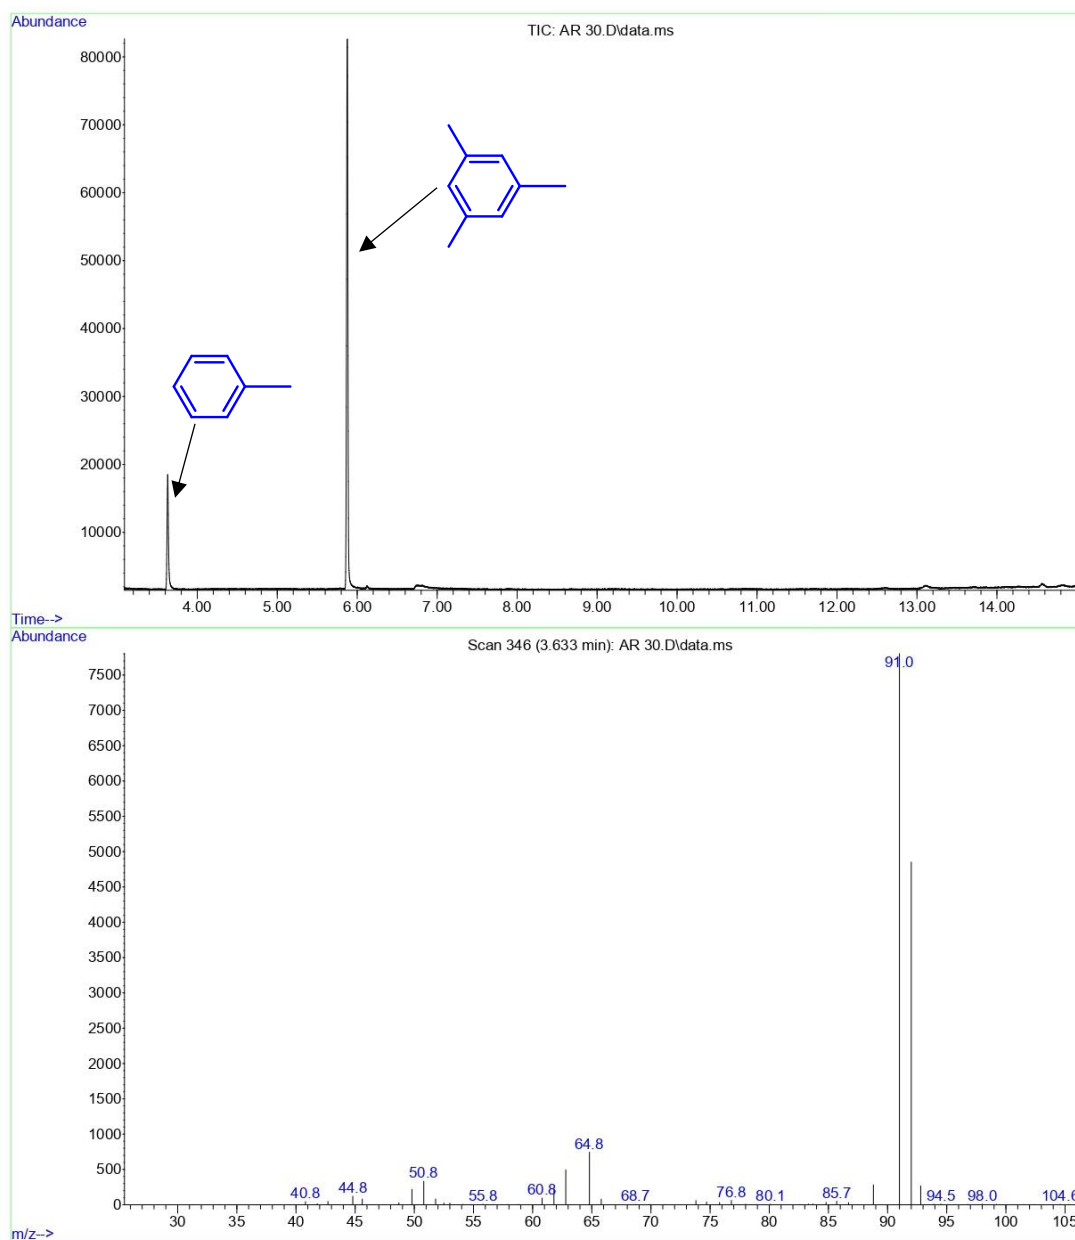

S2.4 GC–MS spectrum of the reaction described in Table 3, entry 4, with mesitylene as the internal standard.

File :D:\Lab Sentral\Data\2022\Yudha Reserch Grup\2024\AR 23.D  
Operator :  
Acquired : 15 Nov 2024 16:09 using AcqMethod Umi.M  
Instrument : GCMS  
Sample Name :  
Misc Info :  
Vial Number: 0

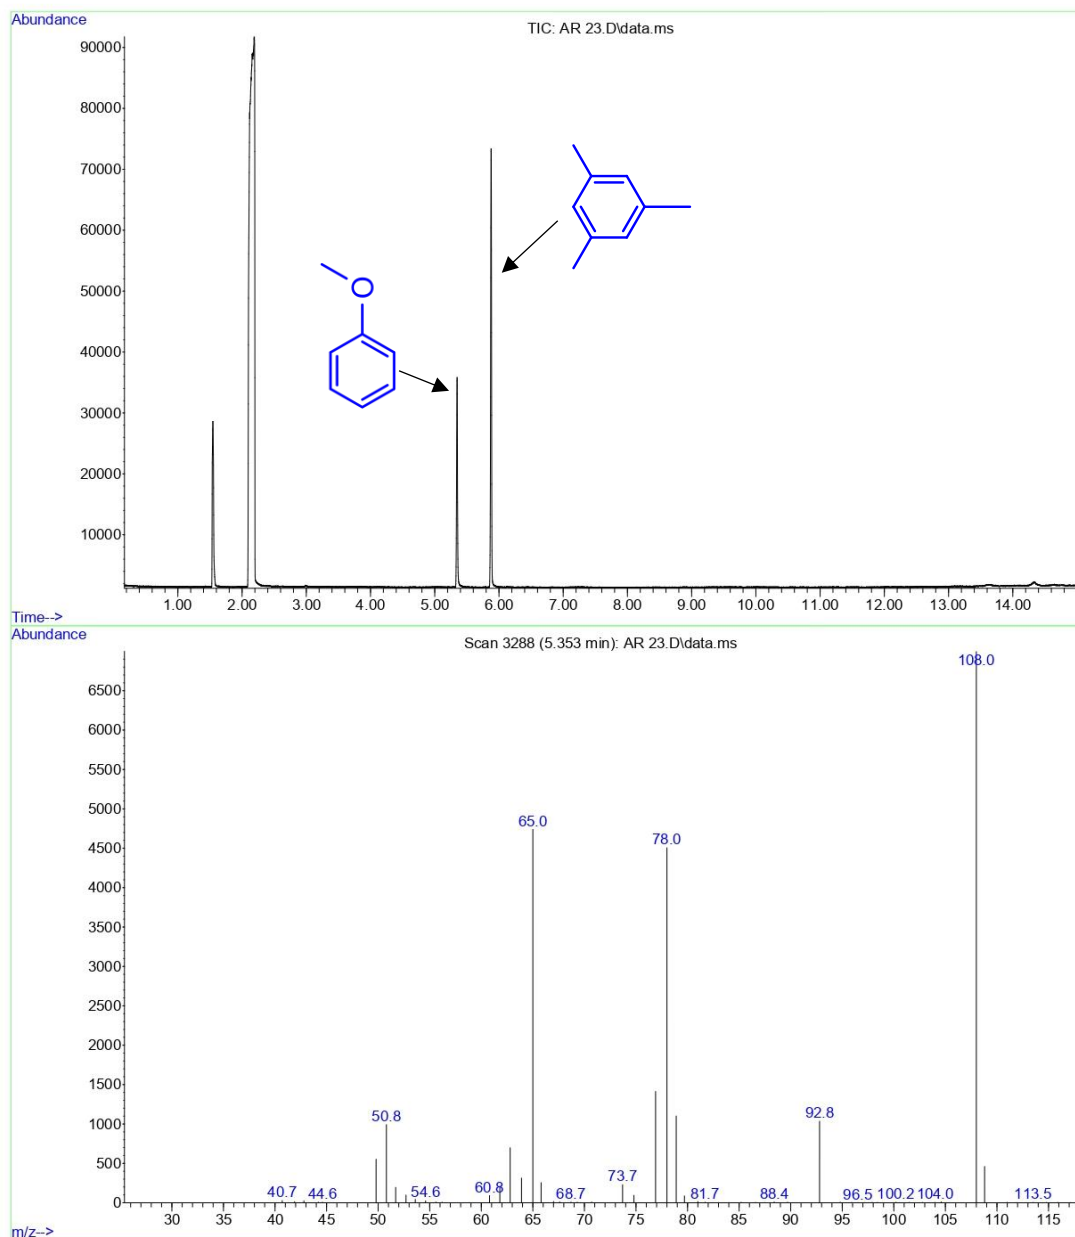

S2.5 GC–MS spectrum of the reaction described in Table 3, entry 5, with mesitylene as the internal standard.

File :D:\Lab Sentral\Data\2022\Yudha Reserch Grup\2024\AR.D  
 Operator :  
 Acquired : 15 Nov 2024 14:31 using AcqMethod Umi.M  
 Instrument : GCMS  
 Sample Name:  
 Misc Info :  
 Vial Number: 0

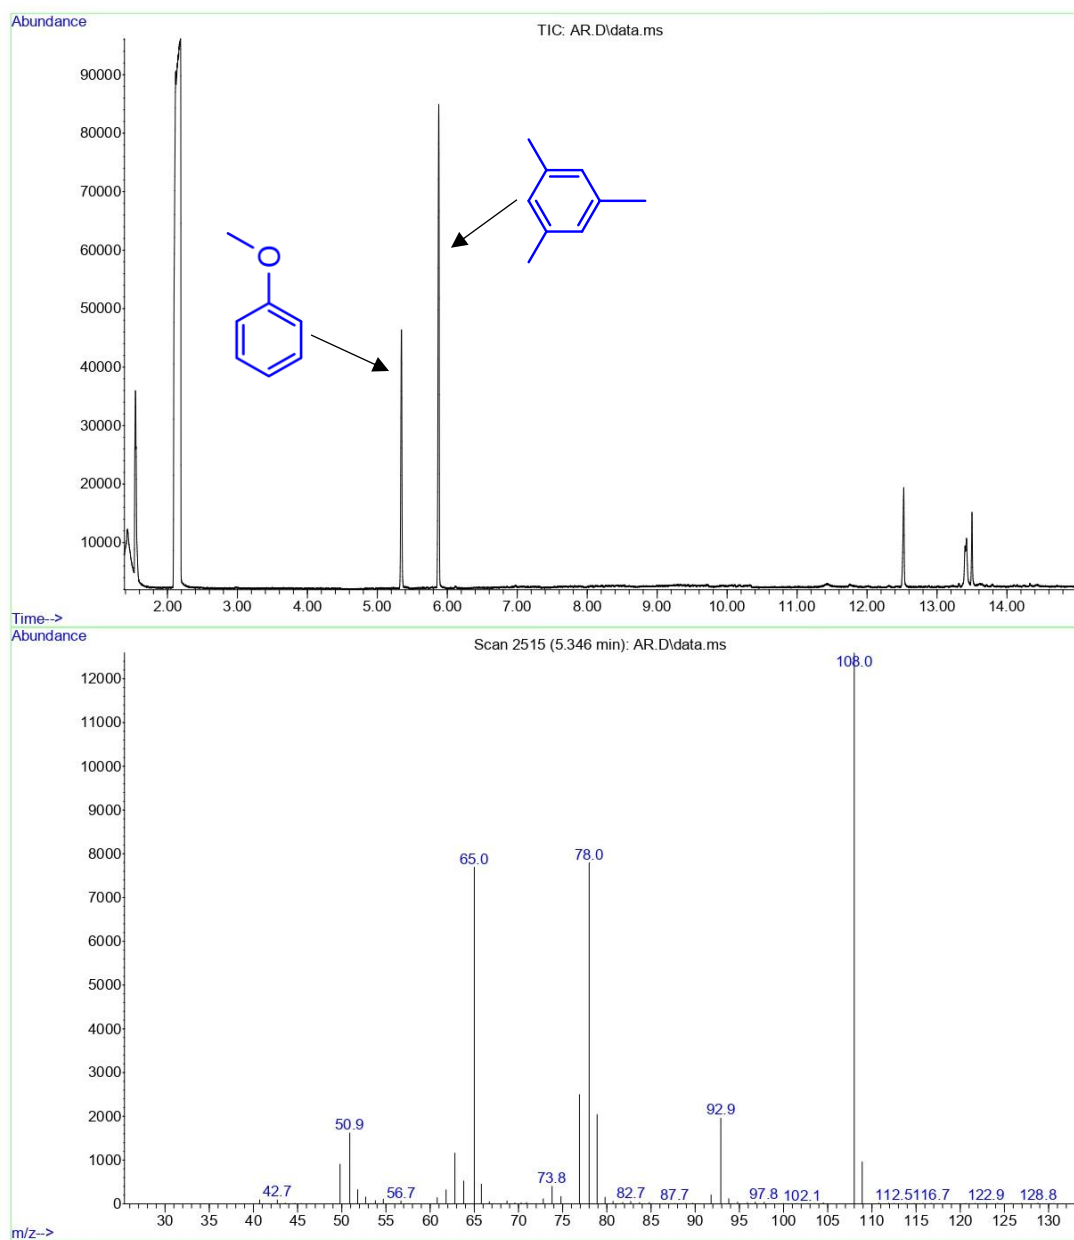

S2.6 GC–MS spectrum of the reaction described in Table 3, entry 6, with mesitylene as the internal standard.

File :D:\Lab Sentral\Data\2022\Yudha Reserch Grup\2024\AR 26.D  
Operator :  
Acquired : 15 Nov 2024 16:58 using AcqMethod Umi.M  
Instrument : GCMS  
Sample Name:  
Misc Info :  
Vial Number: 0

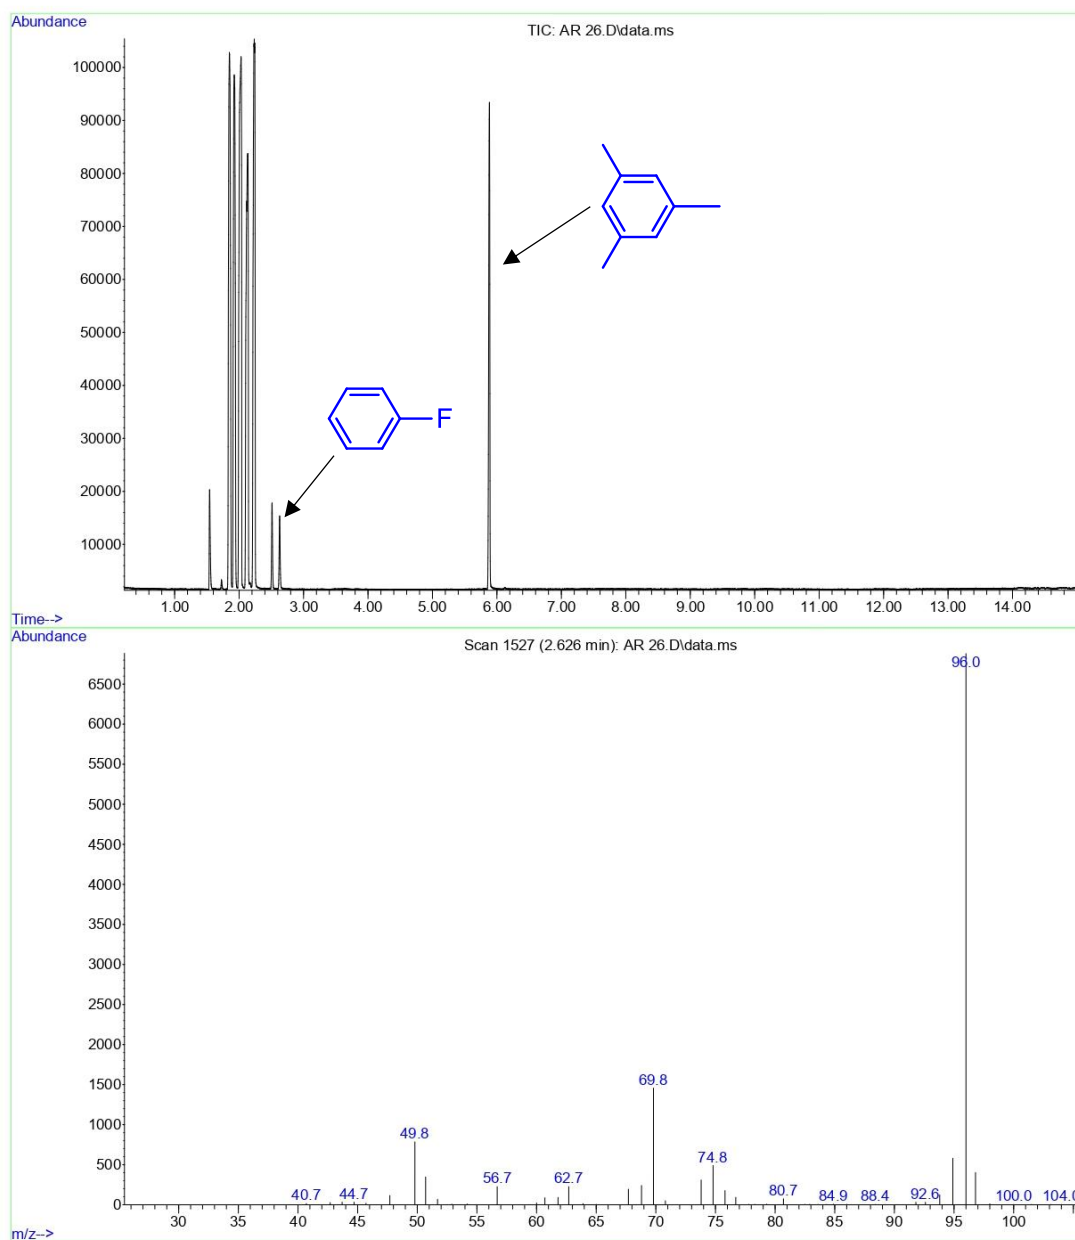

S2.7 GC–MS spectrum of the reaction described in Table 3, entry 7, with mesitylene as the internal standard.

File :D:\Lab Sentral\Data\2022\Yudha Reserch Grup\2024\AR 25.D  
Operator :  
Acquired : 15 Nov 2024 16:33 using AcqMethod Umi.M  
Instrument : GCMS  
Sample Name:  
Misc Info :  
Vial Number: 0

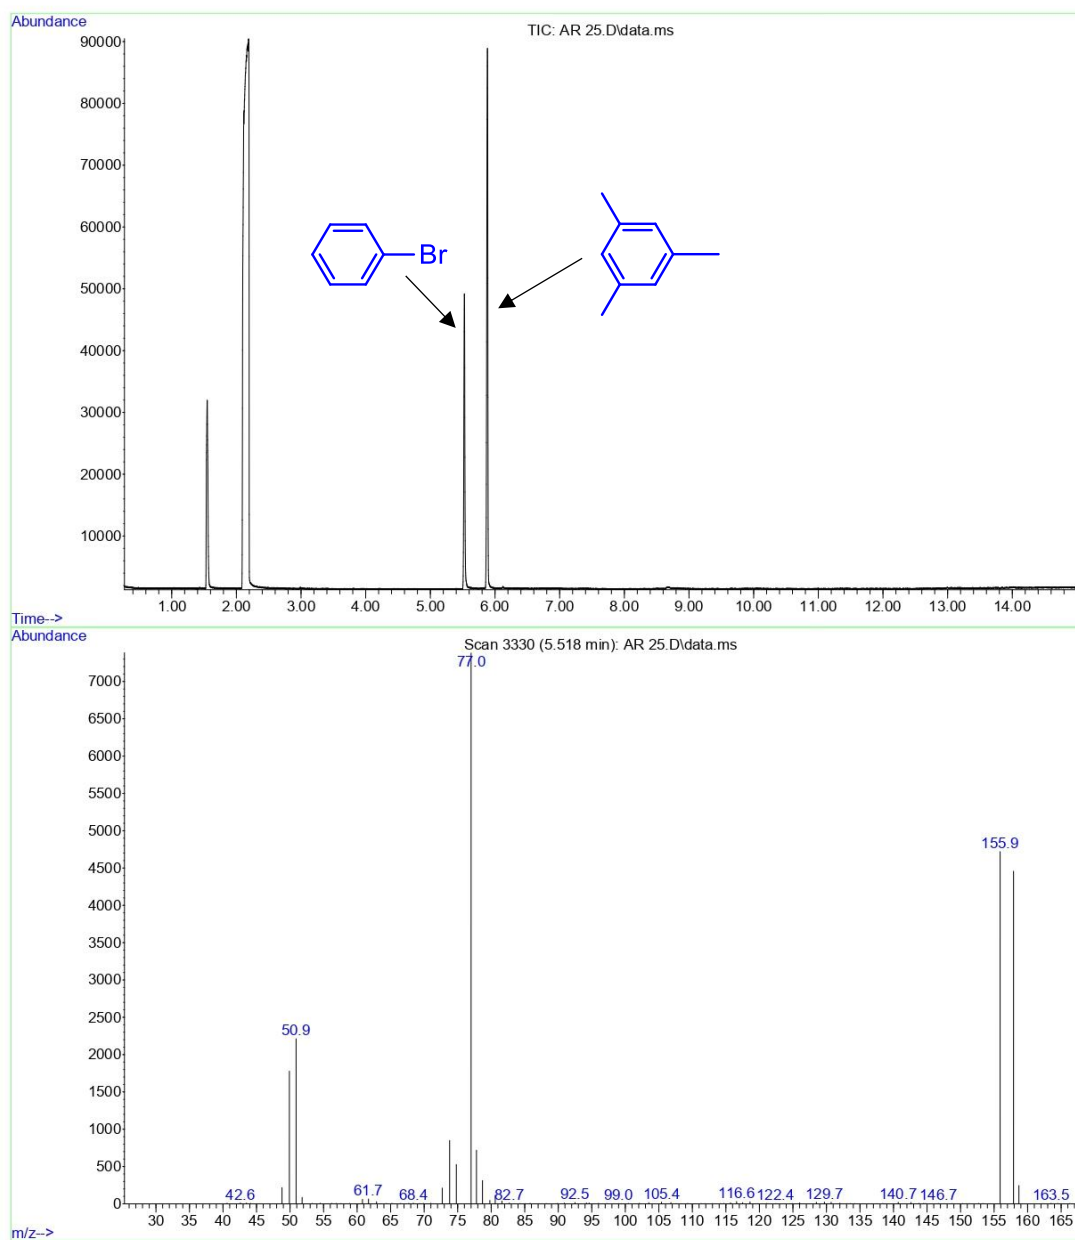

S2.8 GC–MS spectrum of the reaction described in Table 3, entry 8, with mesitylene as the internal standard.

File :D:\Lab Sentral\Data\2022\Yudha Reserch Grup\2024\AR 14.D  
Operator :  
Acquired : 07 Nov 2024 13:56 using AcqMethod Umi.M  
Instrument : GCMS  
Sample Name:  
Misc Info :  
Vial Number: 0

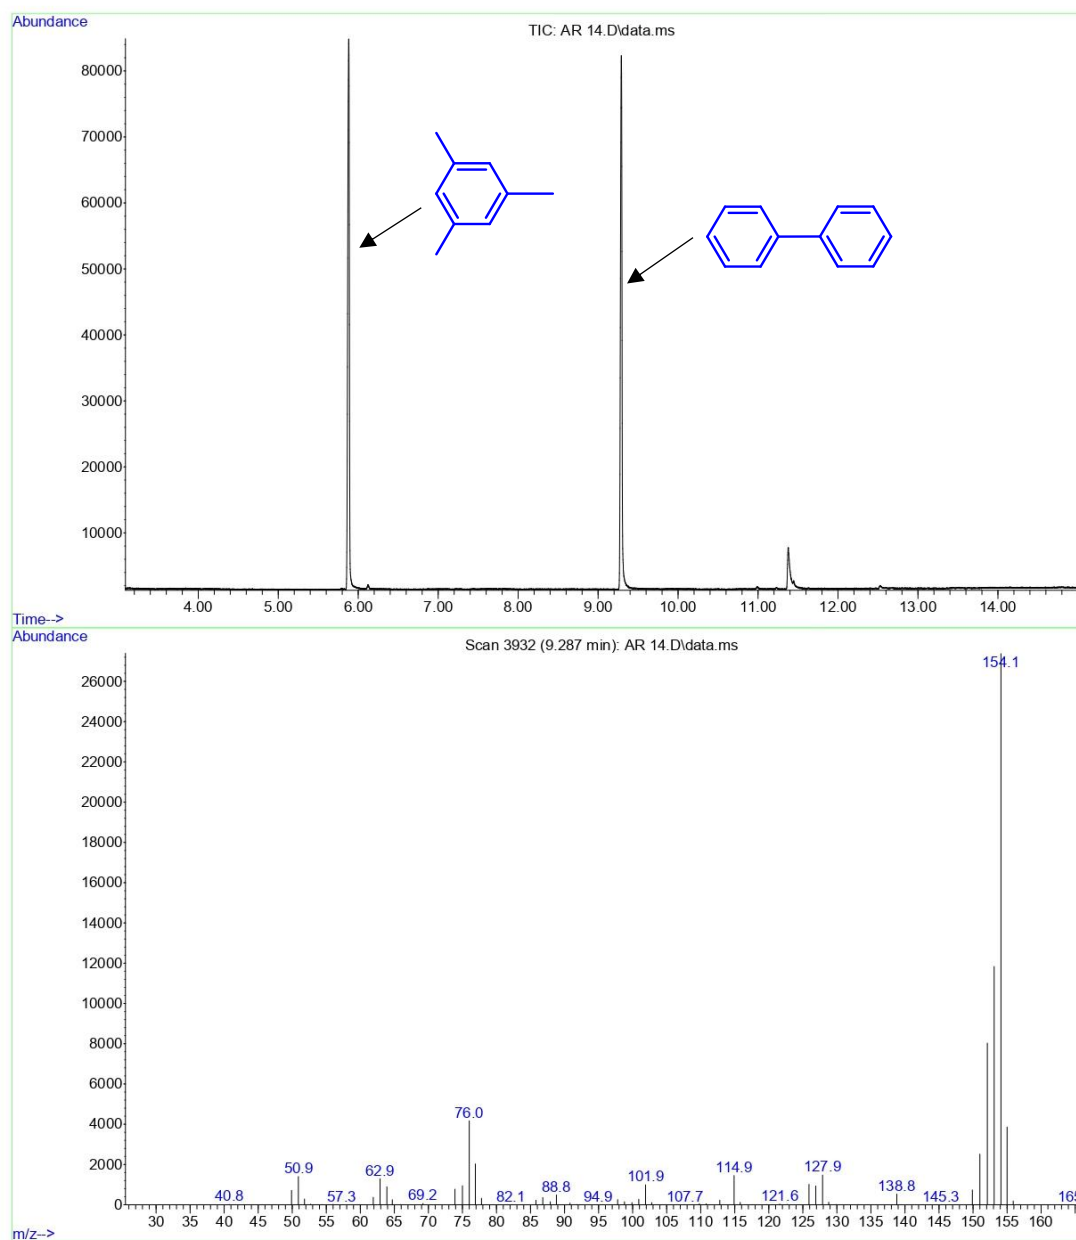



S2.9  $^1\text{H}$  NMR spectrum of **2h** (500 MHz,  $\text{CDCl}_3$ )

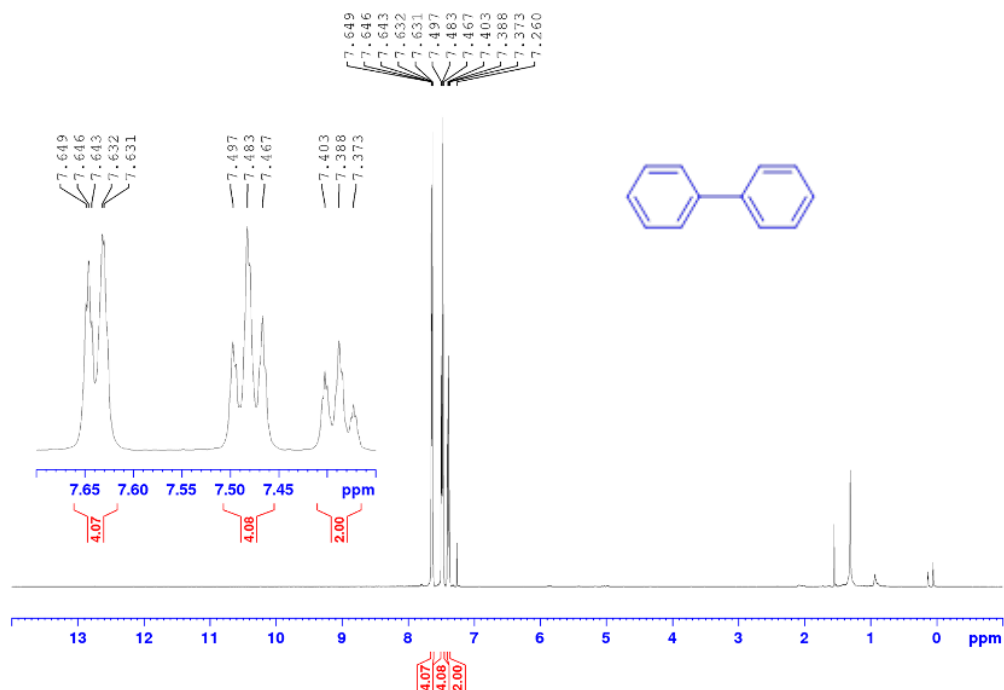

S2.10  $^{13}\text{C}\{^1\text{H}\}$  NMR spectrum of **2h** (125 MHz,  $\text{CDCl}_3$ )

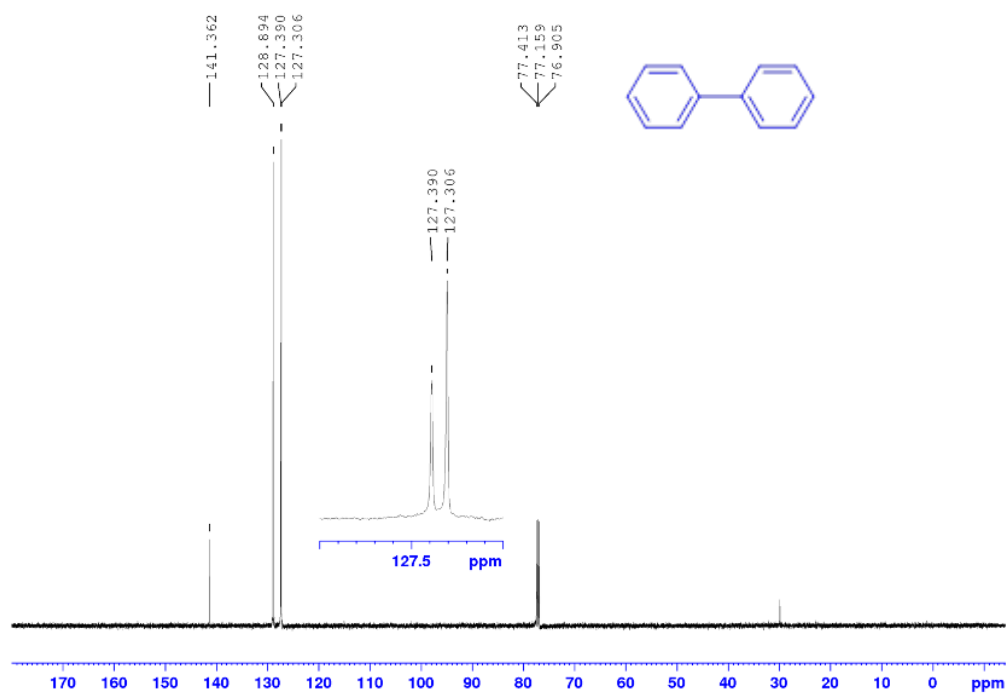

S2.11 GC–MS spectrum of the reaction described in Table 3, entry 9, with mesitylene as the internal standard.

File :D:\Lab Sentral\Data\2022\Yudha Reserch Grup\2024\AR 06 B.D  
Operator :  
Acquired : 19 Aug 2024 08:40 using AcqMethod Umi.M  
Instrument : GCMS  
Sample Name:  
Misc Info :  
Vial Number: 0

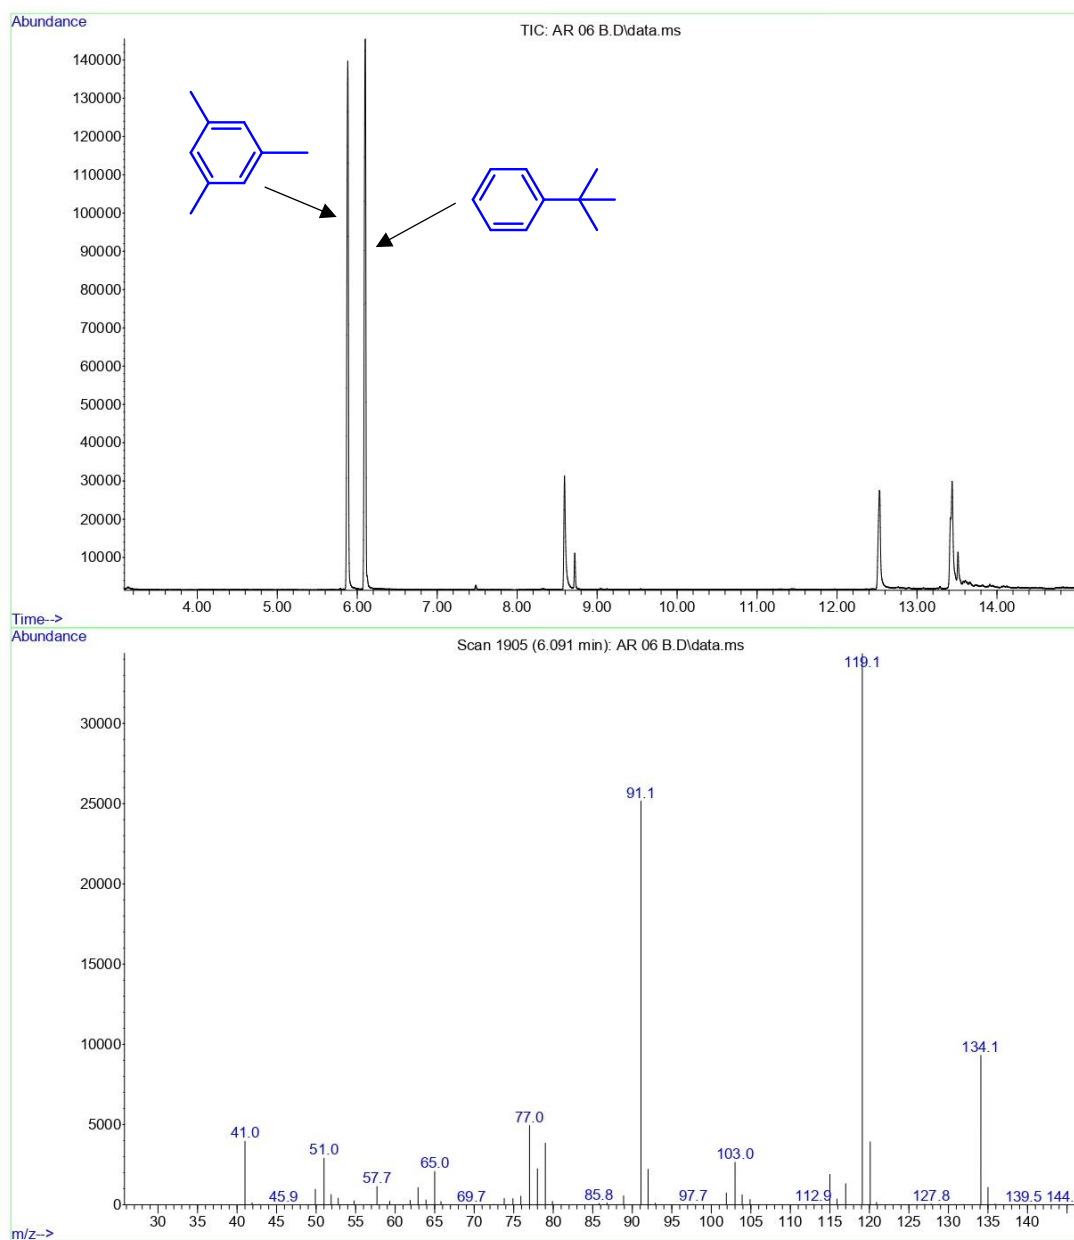

S2.12 GC–MS spectrum of the reaction described in Table 3, entry 10, with mesitylene as the internal standard.

File :D:\Lab Sentral\Data\2022\Yudha Reserch Grup\2024\AR 21.D  
Operator :  
Acquired : 12 Nov 2024 08:09 using AcqMethod Umi.M  
Instrument : GCMS  
Sample Name:  
Misc Info :  
Vial Number: 0

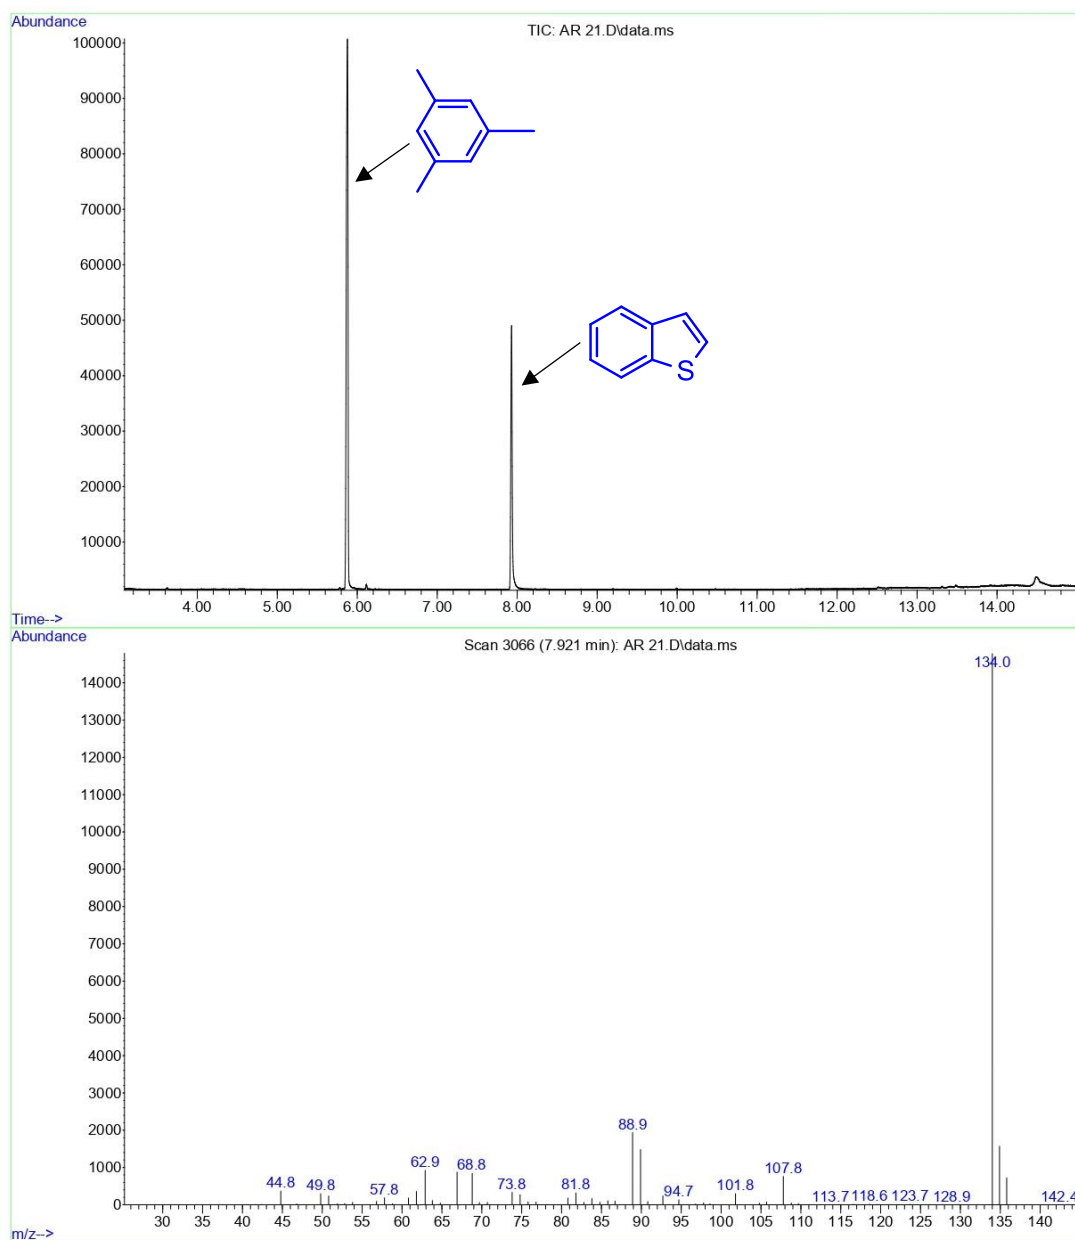

S2.13 GC–MS spectrum of the reaction described in Table 3, entry 11, with mesitylene as the internal standard.

File :D:\Lab Sentral\Data\2022\Yudha Reserch Grup\2025\AR-39.D  
 Operator :  
 Acquired : 31 Jan 2025 16:16 using AcqMethod Umi.M  
 Instrument : GCMS  
 Sample Name:  
 Misc Info :  
 Vial Number: 0

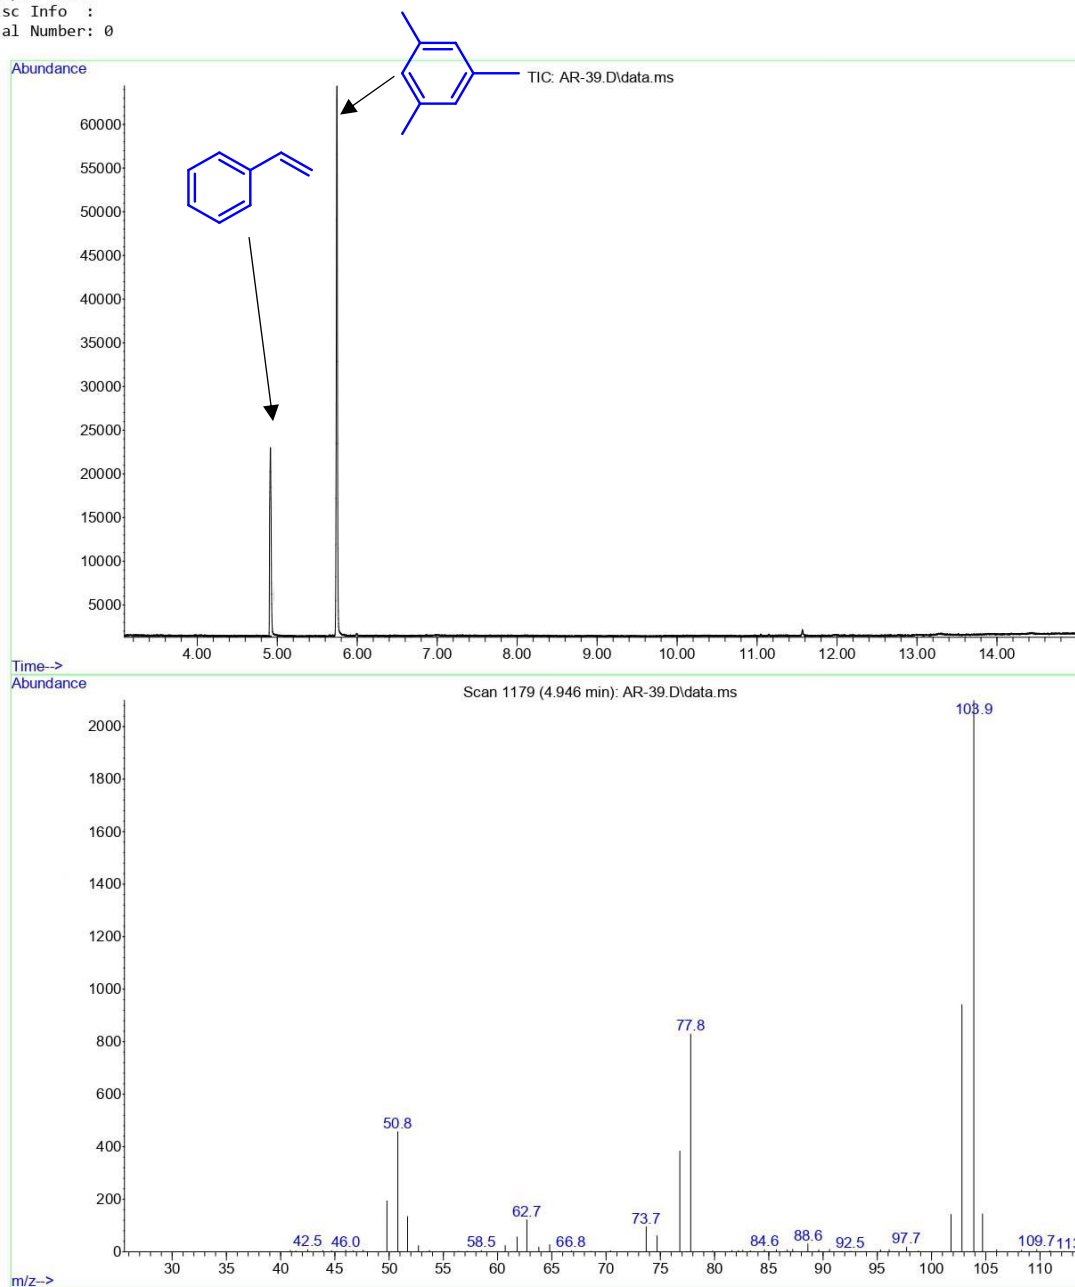

S2.14 GC–MS spectrum of the reaction described in Table 3, entry 12, with mesitylene as the internal standard.

File :D:\Lab Sentral\Data\2022\Yudha Reserch Grup\2025\AR 21 ND.D  
Operator :  
Acquired : 28 Feb 2025 14:28 using AcqMethod Umi.M  
Instrument : GCMS  
Sample Name:  
Misc Info :  
Vial Number: 0

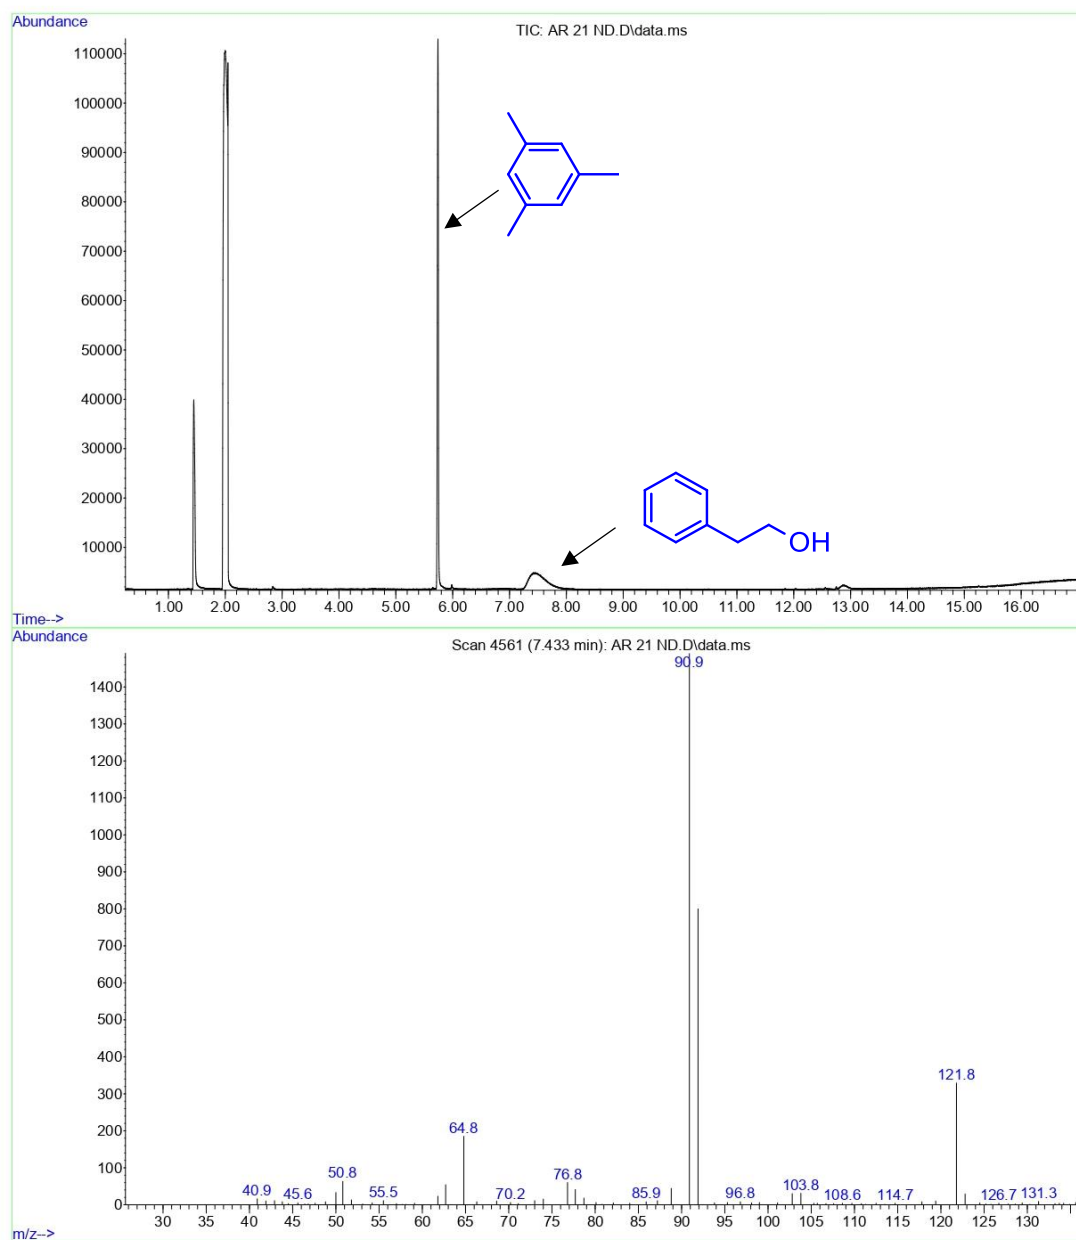

S2.15 GC–MS spectrum of the reaction described in Table 3, entry 13, with mesitylene as the internal standard.

File :D:\Lab Sentral\Data\2022\Yudha Reserch Grup\2025\AR 37.D  
Operator :  
Acquired : 10 Jan 2025 14:38 using AcqMethod Umi.M  
Instrument : GCMS  
Sample Name:  
Misc Info :  
Vial Number: 0

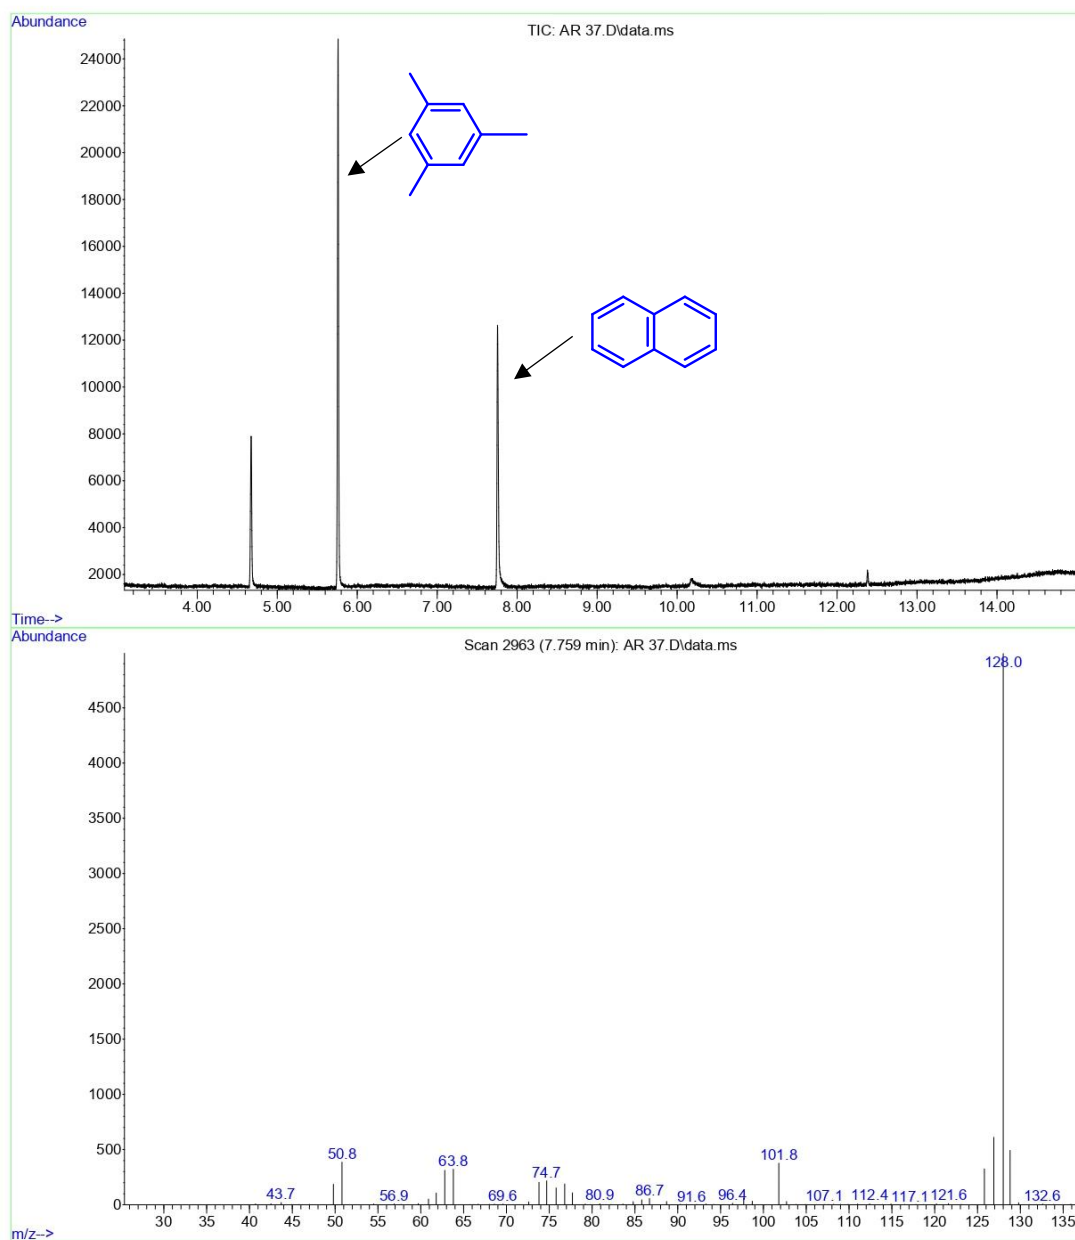

S2.16  $^1\text{H}$  NMR spectrum of **2m** (500 MHz,  $\text{CDCl}_3$ )

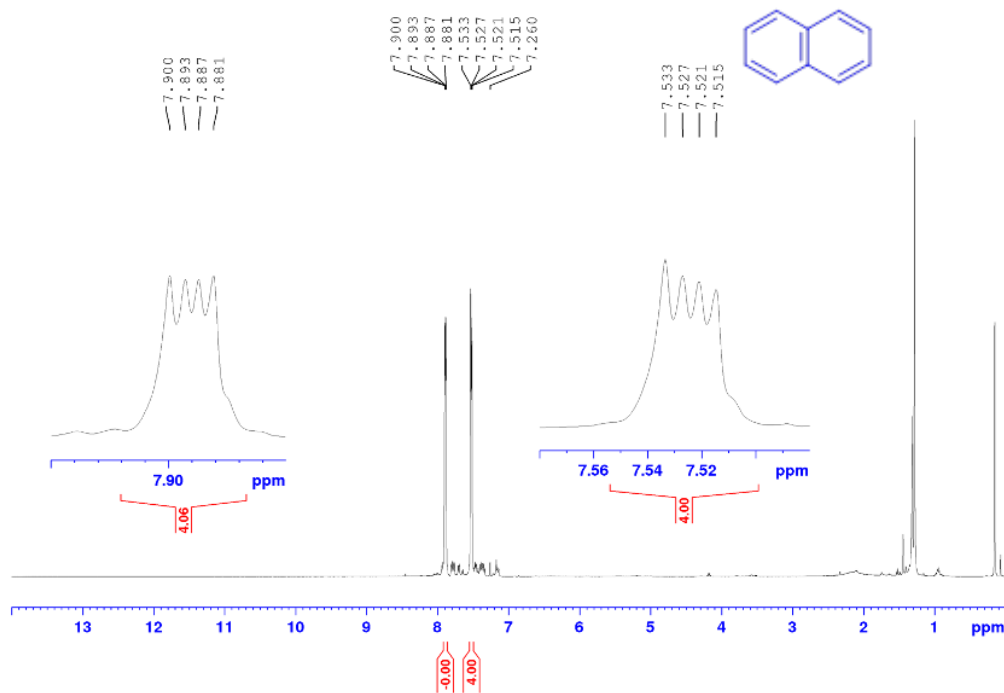

S2.17  $^{13}\text{C}\{^1\text{H}\}$  NMR spectrum of **2m** (125 MHz,  $\text{CDCl}_3$ )

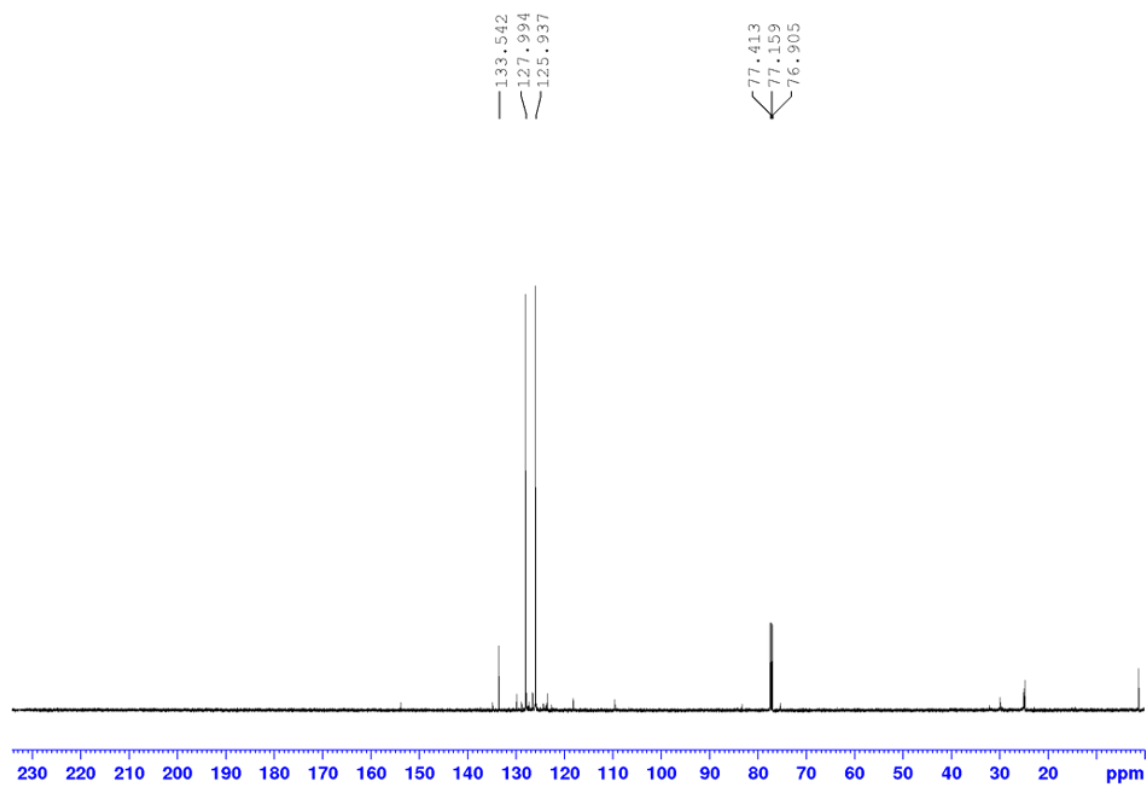

S2.18 GC–MS spectrum of the reaction described in Table 3, entry 13, with mesitylene as the internal standard.

File :D:\Lab Sentral\Data\2022\Yudha Reserch Grup\2025\AR 36.D  
Operator :  
Acquired : 10 Jan 2025 14:12 using AcqMethod Umi.M  
Instrument : GCMS  
Sample Name:  
Misc Info :  
Vial Number: 0

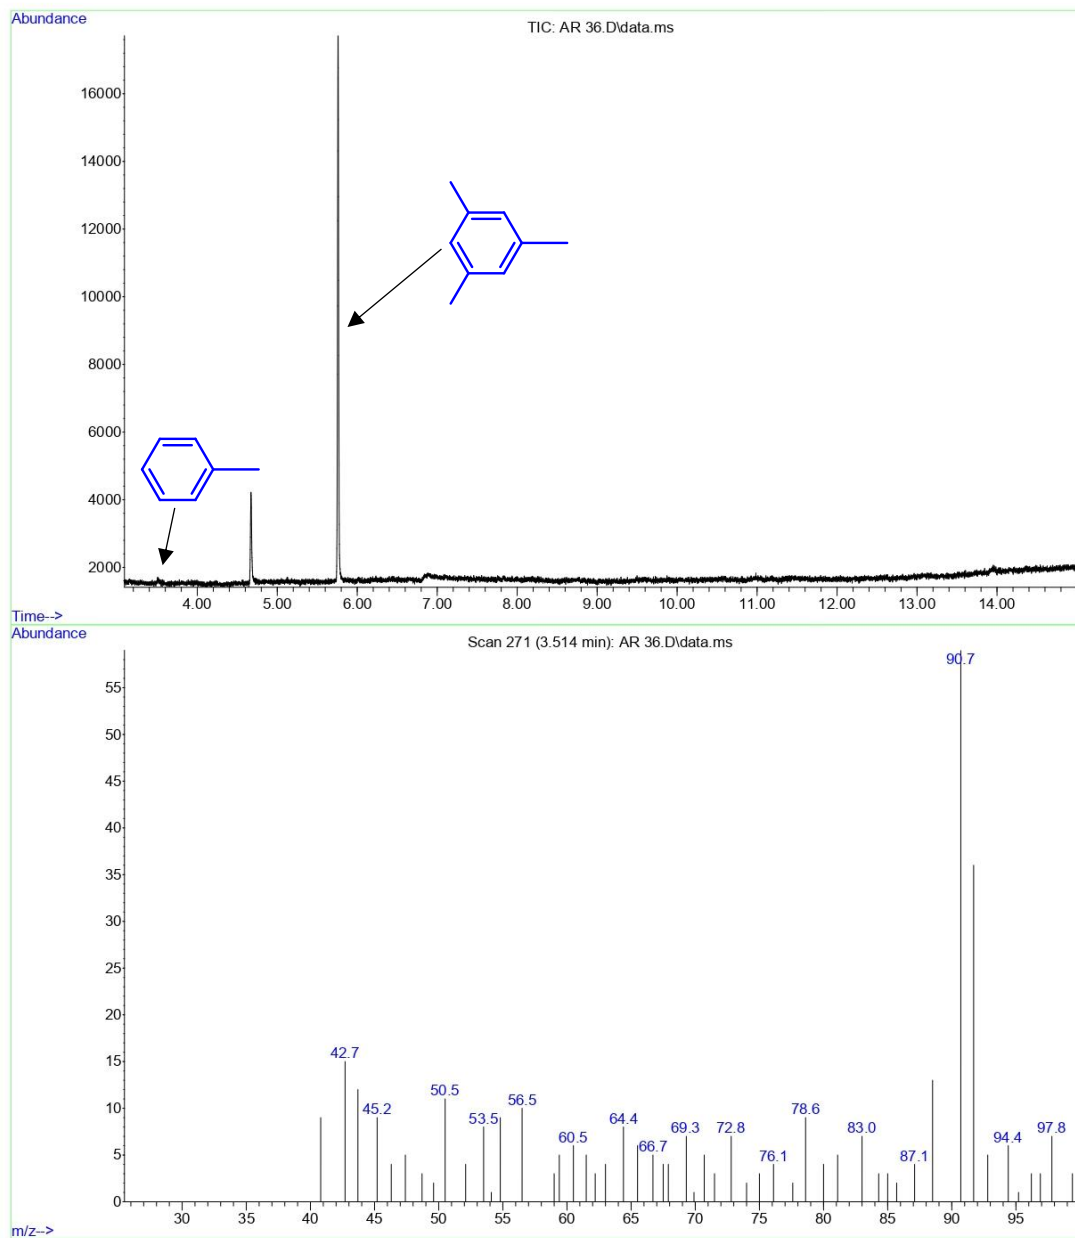



S2.19 GC-MS spectrum of stock toluene adsorption on HKUST-1 with mesitylene as an internal standard.

File :D:\Lab Sentral\Data\2022\Yudha Reserch Grup\2025\AR-42.D  
Operator :  
Acquired : 24 Apr 2025 08:10 using AcqMethod Umi.M  
Instrument : GCMS  
Sample Name:  
Misc Info :  
Vial Number: 0

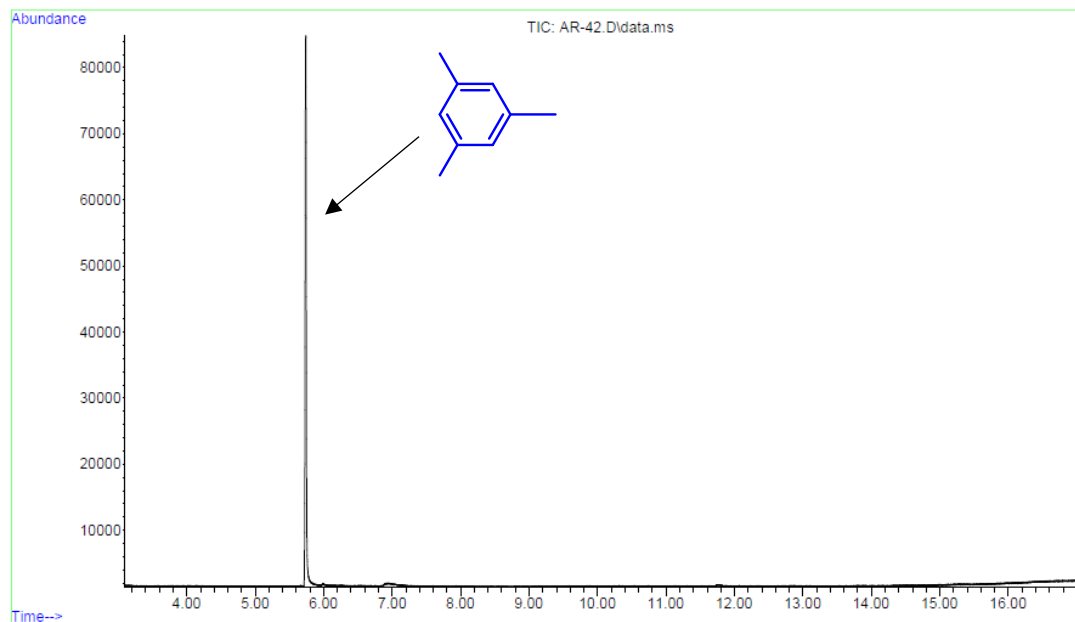

### S3. XRD Data

#### S3.1 XRD Pattern of HKUST-1

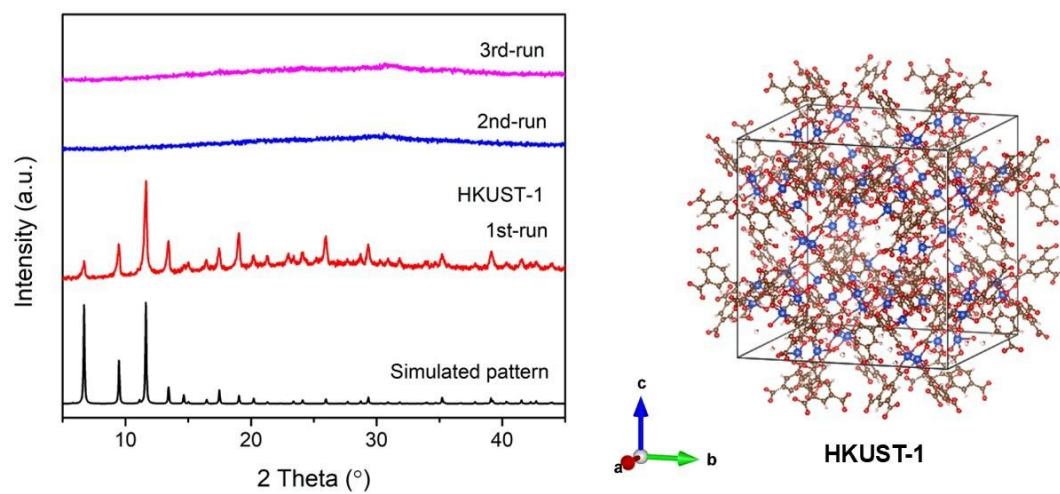

**Fig. S1.** Crystal structure and XRD pattern of HKUST-1 and after several uses.

#### S3.2 XRD Pattern of CuBDC

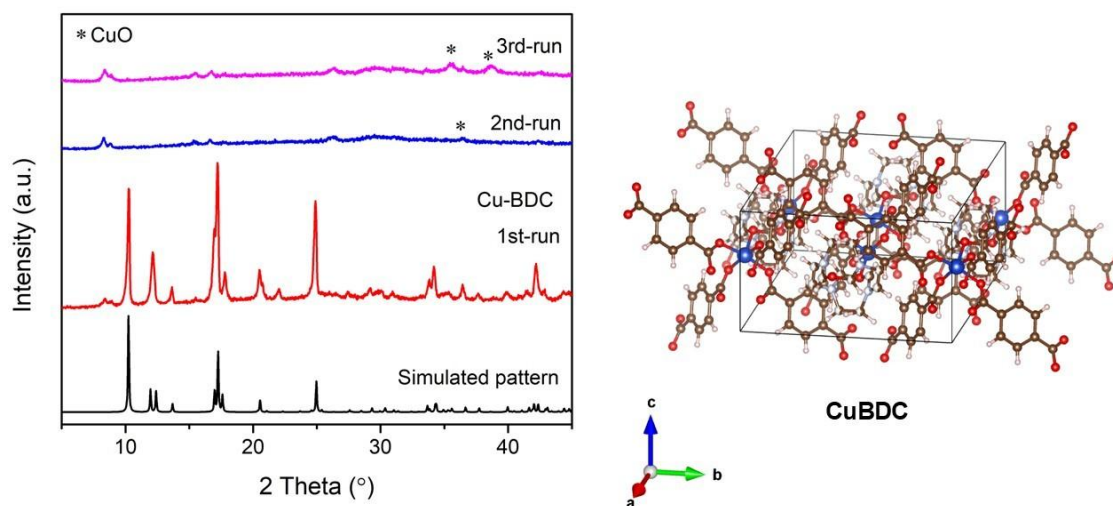

**Fig. S2.** Crystal structure and XRD pattern of CuBDC and after several uses.

#### S4. AAS Data

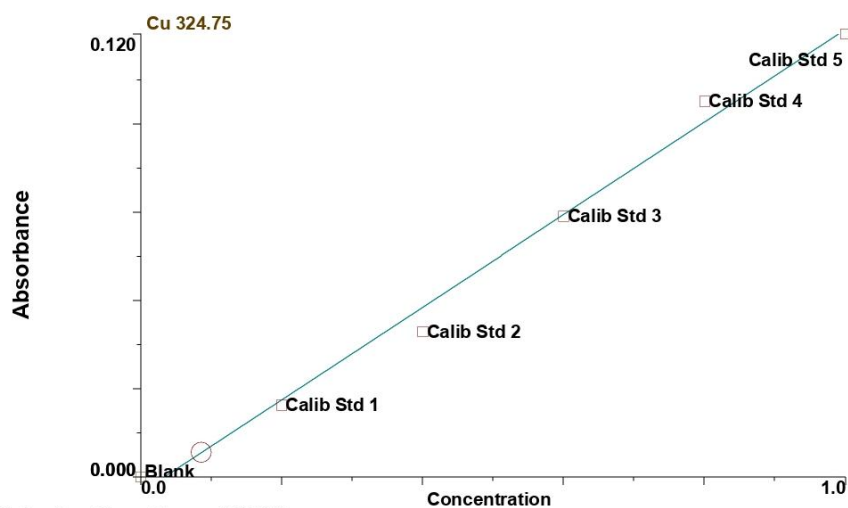

Calibration Curve Slope: 0.12555  
 Calibration Curve Intercept: -0.00418  
 Calibration Curve Correlation Coefficient: 0.995663  
 Calibration Curve Type: Linear, Calculated Intercept  
 Current Sample Concentration: 0.086 mg/L

| Std # | Standard ID | Entered Conc. | Calculated Conc. | Action  |
|-------|-------------|---------------|------------------|---------|
| Blank | Blank       | 0             | 0.033            | Include |
| 1     | Calib Std 1 | 0.2           | 0.189            | Include |
| 2     | Calib Std 2 | 0.4           | 0.347            | Include |
| 3     | Calib Std 3 | 0.6           | 0.596            | Include |
| 4     | Calib Std 4 | 0.8           | 0.845            | Include |
| 5     | Calib Std 5 | 1.0           | 0.990            | Include |

The detected concentrations of nitric acid and ethyl acetate in the sample were 0.002 ppm and 0.003 ppm, respectively. Given a total sample concentration of 0.086 ppm, the measured copper concentration was 0.081 ppm.

Equation: Linear, Calculated Intercept

| ID                                                             | Mean Signal<br>(Abs) | Entered<br>Conc.<br>mg/L | Calculated<br>Conc.<br>mg/L | Standard<br>Deviation | %RSD |
|----------------------------------------------------------------|----------------------|--------------------------|-----------------------------|-----------------------|------|
| Blank                                                          | 0.0000               | 0                        | 0.033                       | 0.00                  | 7.2  |
| Calib Std 1                                                    | 0.0195               | 0.2                      | 0.189                       | 0.00                  | 1.0  |
| Calib Std 2                                                    | 0.0394               | 0.4                      | 0.347                       | 0.00                  | 2.2  |
| Calib Std 3                                                    | 0.0706               | 0.6                      | 0.596                       | 0.00                  | 1.0  |
| Calib Std 4                                                    | 0.1019               | 0.8                      | 0.845                       | 0.00                  | 0.3  |
| Calib Std 5                                                    | 0.1201               | 1.0                      | 0.990                       | 0.00                  | 0.4  |
| Correlation Coef.: 0.995663 Slope: 0.12555 Intercept: -0.00418 |                      |                          |                             |                       |      |

Autosampler Location:

Date Collected: 2/24/2025 10:31:17 AM

Data Type: Original

| Repl  | SampleConc | StdndConc | BlnkCorr | Time     | Signal |
|-------|------------|-----------|----------|----------|--------|
| #     | mg/L       | mg/L      | Signal   |          | Stored |
| 1     | 0.026      | 0.026     | -0.001   | 10:31:18 | No     |
| 2     | 0.006      | 0.006     | -0.003   | 10:31:22 | No     |
| 3     | 0.005      | 0.005     | -0.004   | 10:31:27 | No     |
| Mean: | 0.012      | 0.012     | -0.003   |          |        |
| SD:   | 0.012      | 0.012     | 0.0015   |          |        |
| %RSD: | 99.58      | 99.58     | 58.26    |          |        |

Autosampler Location:

Date Collected: 2/24/2025 10:31:34 AM

Data Type: Original

| Rep#  | SampleConc | StdConc | BlncCorr | Time     | Signal |
|-------|------------|---------|----------|----------|--------|
| #     | mg/L       | mg/L    | Signal   |          | Stored |
| 1     | 0.003      | 0.003   | -0.004   | 10:31:34 | No     |
| 2     | 0.002      | 0.002   | -0.004   | 10:31:38 | No     |
| 3     | 0.002      | 0.002   | -0.004   | 10:31:42 | No     |
| Mean: | 0.002      | 0.002   | -0.004   |          |        |
| SD:   | 0.001      | 0.001   | 0.0001   |          |        |
| %RSD: | 25.65      | 25.65   | 1.83     |          |        |

Autosampler Location:

Date Collected: 2/24/2025 10:31:56 AM

Data Type: Original

| Repl<br># | SampleConc<br>mg/L | StdConc<br>mg/L | BlnkCorr<br>Signal | Time     | Signal<br>Stored |
|-----------|--------------------|-----------------|--------------------|----------|------------------|
| 1         | 0.006              | 0.006           | -0.003             | 10:31:57 | No               |
| 2         | 0.004              | 0.004           | -0.004             | 10:32:02 | No               |
| 3         | 0.005              | 0.005           | -0.004             | 10:32:06 | No               |
| Mean:     | 0.005              | 0.005           | -0.004             |          |                  |
| SD:       | 0.001              | 0.001           | 0.0001             |          |                  |
| %RSD:     | 22.22              | 22.22           | 3.74               |          |                  |

Autosampler Location

Date Collected: 2/24/2025 10:32:20 AM

Data Type: Original

| Repl<br># | SampleConc<br>mg/L | StdConc<br>mg/L | BlnkCorr<br>Signal | Time     | Signal<br>Stored |
|-----------|--------------------|-----------------|--------------------|----------|------------------|
| 1         | 0.087              | 0.087           | 0.007              | 10:32:20 | No               |
| 2         | 0.086              | 0.086           | 0.007              | 10:32:25 | No               |
| 3         | 0.086              | 0.086           | 0.007              | 10:32:29 | No               |
| Mean:     | 0.086              | 0.086           | 0.007              |          |                  |
| SD:       | 0.001              | 0.001           | 0.0001             |          |                  |
| %RSD:     | 1.067              | 1.067           | 1.74               |          |                  |

## References

1. C. Liu, X. Li, Y. Wu and J. Qiu, *RSC Adv.*, 2014, **4**, 54307–54311.
2. Y.P. Budiman, M. Rashifari, S. Azid, I.Z. Ghafara, Y. Deawati, Y. Permana, U.S.F. Arrozi, W. Ciptonugroho, T. Mayanti and W.W. Lestari, *ChemistrySelect*, 2024, **9**, e202304913.
3. Z. Gai, B. Yu, X. Wang, Z. Deng and P. Xu, *Microbiology*, 2008, **154**, 3804–3812.
4. S. Abrantes, *J. High Resol. Chromatogr.*, 1993, **16**, 113–115.
5. B.M. El-Haj, A.M. Al-Amri, M.H. Hassan, R.K. Bin-Khadem and A.A. Al-Hadi, *J. Anal. Toxicol.*, 2000, **24**, 390–394.
